# Supplementary material for: A randomised controlled trial comparing surgical intervention rates between two protocols for the management of asymptomatic adnexal tumours in postmenopausal women
Source: PubMed Central journal article supplement — BMJ Open. 2012 Dec 12;2(6):e002248. doi: 10.1136/bmjopen-2012-002248 (PMC3533090; doi:10.1136/bmjopen-2012-002248), 2012-12-12

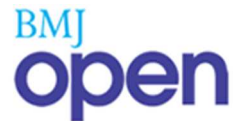

**A randomised controlled trial comparing surgical intervention rates between two protocols for the management of asymptomatic adnexal tumours in postmenopausal women: A study protocol**

|                                 |                                                                                                                                                                                                                                                                   |
|---------------------------------|-------------------------------------------------------------------------------------------------------------------------------------------------------------------------------------------------------------------------------------------------------------------|
| Journal:                        | <i>BMJ Open</i>                                                                                                                                                                                                                                                   |
| Manuscript ID:                  | bmjopen-2012-001989                                                                                                                                                                                                                                               |
| Article Type:                   | Protocol                                                                                                                                                                                                                                                          |
| Date Submitted by the Author:   | 21-Aug-2012                                                                                                                                                                                                                                                       |
| Complete List of Authors:       | Nunes, Natalie; University College Hospital, Gynaecology<br>Foo, Xulin; University College Hospital, Gynaecology<br>Widschwendter, Martin; University College Hospital, Department of Women's Cancer<br>Jurkovic, Davor; University College Hospital, Gynaecology |
| <b>Primary Subject Heading</b>: | Radiology and imaging                                                                                                                                                                                                                                             |
| Secondary Subject Heading:      | Reproductive medicine, obstetrics and gynaecology, Diagnostics, Oncology                                                                                                                                                                                          |
| Keywords:                       | Gynaecological oncology < GYNAECOLOGY, Protocols & guidelines < HEALTH SERVICES ADMINISTRATION & MANAGEMENT, Health economics < HEALTH SERVICES ADMINISTRATION & MANAGEMENT, Ultrasound < RADIOLOGY & IMAGING, Adult surgery < SURGERY, ULTRASONOGRAPHY           |
|                                 |                                                                                                                                                                                                                                                                   |

SCHOLARONE™  
Manuscripts

only

Short Title: RCT of two management protocols for asymptomatic adnexal tumours

**A randomised controlled trial comparing surgical intervention rates between two protocols for the management of asymptomatic adnexal tumours in postmenopausal women: A study protocol**

Natalie Nunes<sup>1</sup>, Xulin Foo<sup>1</sup>, Martin Widschwendter<sup>2</sup>, Davor Jurkovic<sup>1\*</sup>

<sup>1</sup>Gynaecological Diagnostic Outpatient Treatment Unit, University College Hospital, London, United Kingdom

<sup>2</sup>Department of Women's Cancer, University College London, Elizabeth Garrett Anderson, Institute for Women's Health, London, United Kingdom

\*Correspondence: [davor.jurkovic@nhs.net](mailto:davor.jurkovic@nhs.net)

Department of Obstetrics and Gynaecology, University College Hospital, 235 Euston Road, London, NW1 2BU, UK

## Abstract

### Introduction:

Detection of asymptomatic adnexal tumours in postmenopausal women has increased due to wider use of diagnostic ultrasound and imaging quality improvements. Reliable methods to differentiate between benign and malignant tumours are required to avoid delays in treating ovarian cancer and to prevent unnecessary interventions for benign lesions. In the UK the Royal College of Obstetricians and Gynaecologists (RCOG) has issued guidance for the management of adnexal cysts in postmenopausal women, which is considered standard in routine clinical practice. The protocol uses the Risk of Malignancy Index (RMI) calculation. This protocol has a relatively high intervention rate in order to avoid a delay in a cancer diagnosis. The Simple Rules Protocol designed by International Ovarian Tumour Analysis Group (IOTA) reports a low false positive rate in the diagnosis of ovarian cancer without a loss of sensitivity and therefore has the potential to reduce unnecessary interventions in asymptomatic postmenopausal women with benign cysts.

### Methods and analysis:

140 postmenopausal women aged 40-80, with incidentally detected adnexal tumours on ultrasound scan will be recruited to this study. They will be randomly allocated, to be assessed and managed according to either of the two protocols under investigation. In both arms of the study the tumours will be classified into three groups: high, intermediate or low risk of malignancy. Women with high risk of malignancy will be referred for surgery in a tertiary cancer centre, women with low risk tumours will be managed expectantly, whilst those with intermediate risk findings will be operated on in their local hospital units. Analysis will be on an intention to treat basis.

### Ethics and dissemination:

1  
2  
3 Research ethical approval was granted by the North London Research Ethical  
4 Committee 2 (10/H0724/48). Trial results will be published according to the  
5 CONSORT statement.  
6  
7

8 **Trial registration number:**

9 Registration at <http://www.controlled-trials.com/ISRCTN89034131/>.  
10 **ISRCTN89034131**  
11

12  
13  
14 **Keywords**

15  
16 Adnexal tumours, Ovarian cysts, Postmenopausal, RMI, RCOG, IOTA Simple Rules,  
17 Management protocols  
18  
19  
20  
21  
22  
23  
24  
25  
26  
27  
28  
29  
30  
31  
32  
33  
34  
35  
36  
37  
38  
39  
40  
41  
42  
43  
44  
45  
46  
47  
48  
49  
50  
51  
52  
53  
54  
55  
56  
57  
58  
59  
60

## Introduction

Wider and more liberal use of diagnostic ultrasound in gynaecological clinics has resulted in the detection of adnexal tumours in a large number of asymptomatic postmenopausal women. There has also been an increase in the use of other imaging modalities such as CT and MRI to assess a variety of medical complaints resulting in incidental detection and adnexal tumours. Any adnexal cyst detected in menopause has a potential of being malignant.

In the United Kingdom the Royal College of Obstetricians and Gynaecologists (RCOG) has issued a guideline for the management of cysts in postmenopausal women, which is widely used in the routine clinical practice.<sup>1</sup> According to this protocol all adnexal cysts/tumours are categorised as high, intermediate and low risk of being malignant. This categorisation is based on the Risk of Malignancy Index (RMI) calculation.<sup>2</sup> This model calculates a score which is the product of the value of the CA 125 (U/ml), a score for menopausal status (1 if pre-menopausal and 3 if postmenopausal) and a greyscale ultrasound score of 0, 1 or 3 where 1 score is given each for bilaterality, ascites, multilocular, solid areas and intra-abdominal metastases. In the original study by Jacobs, a score of >200 gave a sensitivity of 85% and a specificity of 97% for the diagnosis of ovarian cancer. A recent systematic review of 16 studies assessing the diagnostic performance of RMI showed that the test had an overall sensitivity of 78% (95% CI 71–85%) and a specificity of 87% (95% CI 83–91%).<sup>3</sup>

The RMI has the advantage of being simple and widely used. Its disadvantage though is that it includes a blood test for CA125, which adds to the cost. In addition the diagnosis is delayed until the result of blood test is available. The absolute value of the RMI and the level of CA125 in serum are used to determine the management plan. Simple unilateral adnexal cysts of <5cm with an RMI of <25 and where the CA 125 is <30u/ml are considered low risk. For cysts with an RMI<25 but where the CA 125  $\geq$  30u/ml, the cyst is  $\geq$  5cm or the cyst has septations or solid areas then these are considered of intermediate risk. Those with a RMI of 25 – 250 are also considered to be of indeterminate risk. Adnexal tumours with a RMI >250 are classified as high risk.<sup>1</sup> (Flowchart) As the main aim of this protocol is to minimise the risk of delaying interventions in women with ovarian cancer, the overall intervention rates are relatively high and many women with benign lesions are treated by surgery.

In recent years the International Ovarian Tumour Analysis (IOTA) collaboration has developed several novel diagnostic models with the aim of improving non-invasive diagnosis of ovarian cancer. In 2008 the collaboration proposed use of 'Simple Rules' to assess tumours.<sup>4</sup> The 'Simple Rules' are based on a structured approach to morphological analysis of ovarian tumours on ultrasound scan. It enables discrimination between benign and malignant lesions without the need to measure tumour markers.

1  
2  
3  
4  
5  
6  
7  
8  
9  
10  
11  
12  
13  
14  
15  
16  
17  
18  
19  
20  
21  
22  
23  
24  
25  
26  
27  
28  
29  
30  
31  
32  
33  
34  
35  
36  
37  
38  
39  
40  
41  
42  
43  
44  
45  
46  
47  
48  
49  
50  
51  
52  
53  
54  
55  
56  
57  
58  
59  
60

Ultrasound scan ‘Simple Rules’ use 10 rules to assess adnexal tumours. There are five rules to predict malignancy (M-rules): (1) irregular solid tumour; (2) presence of ascites; (3) at least four papillary structures; (4) irregular multilocular–solid tumour with a largest diameter of at least 100 mm; and (5) very high colour content on colour Doppler examination (colour score 4). There are five rules to suggest a benign tumour (B-rules): (1) unilocular cyst; (2) presence of solid components where the largest solid component is <7 mm in largest diameter; (3) acoustic shadows; (4) smooth multilocular tumour less than 100 mm in largest diameter; and (5) no detectable blood flow on Doppler examination (colour score 1).

If one or more M-rules apply in the absence of a B-rule, the mass is classified as malignant. If one or more B-rules apply in the absence of an M-rule, the mass is classified as benign. If no rule applies or both M and B rules apply, the mass cannot be classified and defined as indeterminate.

These ten rules were applicable to 76% (937/1233) of all tumours in the study, where they resulted in a sensitivity of 93%, specificity of 90%, positive likelihood ratio (LR+) of 9.45 and negative likelihood ratio (LR–) of 0.08.<sup>4</sup> When prospectively tested the rules were applicable in 76% (386/507) of the tumours, where they had a sensitivity of 95% (106/112), a specificity of 91% (249/274), LR+ of 10.37, and LR– of 0.06. The ‘Simple Rules’ were subsequently tested prospectively.<sup>5</sup> The rules were applicable in 77% of the 1938 women with a sensitivity of 92% (95% confidence interval 89% to 94%) and specificity of 96% (94% to 97%).

The Simple Rules Model is particularly suitable for the use in standard clinical practice and, similar to the RMI, also divides the cysts into high, intermediate and low risk categories. There is some evidence, albeit limited, that the Simple Rules model may be superior to the RMI in terms of sensitivity and specificity.<sup>2,5,6</sup> Successful use of Simple Rules require more skilled ultrasound operators, but there is no need for additional blood tests and the results are available instantly.

## Methods and analysis

The aim of this study is to assess the difference in the intervention rates between two different protocols for the management of incidentally detected adnexal tumours in postmenopausal women.

This is a prospective randomised controlled trial that will take place at the University College London Hospital gynaecology clinic. Women will be randomised into two groups. The first group will be assessed and managed in accordance with the current Royal College of Obstetricians and Gynaecologists protocol for the management of cysts in postmenopausal women.<sup>1</sup> The second group of women will be assessed using the “Simple Rules”.<sup>4</sup>

### Inclusion criteria

All postmenopausal women aged 40-80 who are referred for an asymptomatic adnexal tumour or those found to have one at the time of their visit to the Gynaecology unit will be invited to take a part of the study. Postmenopausal women are defined as those who have had one year of spontaneous amenorrhoea above the age of 40 where no illness or medication may have caused the amenorrhoea or those at or above the age of 50 who have had a hysterectomy. Women will be judged to be asymptomatic if they did not present with pain localised to the area of the tumour or the lower pelvis.

Women who present with pelvic pain that could be attributed to the tumour and those who are younger than 40 or older than 80 years of age will be excluded. Women who are unable to consent and those with simple unilateral unilocular cysts <2cm in size will also be excluded as the RCOG guideline stipulates these women do not require follow up.

### Interventions

All women will have an initial ultrasound scan. Those randomised to the RCOG/RMI group will also have a blood test taken for the measurement of serum CA125. The tumours will be classified as low, intermediate and high risk as previously described (flowchart) In the Simple Rules group, adnexal tumours will be classified as low risk if one or more B-rules apply in the absence of an M-rule. If one or more M-rules apply in the absence of a B-rule, the mass will be classified as high risk. If no rules apply or if both M and B rules apply, the tumour will be classified as intermediate risk.

Women with tumours classified as high risk of malignancy on either protocol, will be referred to the Gynaecological Oncology team. Tumours found to be of intermediate risk will be offered surgery by the general gynaecology team. All asymptomatic women diagnosed with low risk tumours will be managed conservatively and have 4 monthly scans for 1 year observing for any changes in the tumour size or morphology. Should the characteristics of the tumour change prompting its reclassification into intermediate or high risk category the management plan will be modified accordingly.

### Randomisation

A statistician using a Stata 12.1 ® (Stata Corp., College Station, TX, USA) will generate the blocked randomisation list with varying block sizes. The randomisation numbers will be placed in sealed, opaque, numbered envelopes and kept in a box locked in a filing cabinet. This randomisation ensures allocation concealment. When a patient consents, a clinic nurse who is not part of the research team will access the next envelope and give it to the recruiting doctor.

### Outcome measures

1  
2  
3 The primary outcome is the rate of surgical intervention. Secondary outcomes  
4 include the sensitivities, number of staging procedures number of surgical  
5 complications and number of delayed diagnoses of ovarian cancer (invasive as well  
6 as borderline tumours) or the false negative rate.  
7  
8

### 9 **Data Collection and Statistical analysis**

10 The data is collected on a pre-designed proforma, which is then filed. This is  
11 transferred to a Microsoft Excel database in preparation for analysis. A Chi-square  
12 test or Fisher's exact test will be used will be used to assess significant differences in  
13 the intervention rates between the two management protocols.  
14

15 Analysis will be on an intention to treat basis of all patients who fit the inclusion  
16 criteria. The researchers will do the analysis with the statistician at the midpoint  
17 and at the end.  
18  
19

### 20 **Pilot Study and Sample Size**

21 A preliminary prospective audit of 67 patients was done. These patients were aged  
22 47 to 90 years. Using RMI/RCOG group protocol 41/67 [61.2% (95% CI 48.5 to  
23 72.9)] were classified as requiring a surgical intervention compared to 5/67[7.5%  
24 (95%CI;2.5 to 16.6)] when the 'Simple Rules' protocol was used. The women with  
25 the final diagnosis of ovarian cancer were classified as high (n=1) or intermediate  
26 (n=1) risk by both protocols and they both had surgery performed by the  
27 gynaecological oncology team. We will assume that some patients offered  
28 conservative management will choose to still have surgery and that some patients  
29 who are offered surgery will choose not have an operation.  
30  
31  
32  
33

34 A significant improvement of surgical rates is considered to be a 50% reduction  
35 without a significant difference in the number of women with a delayed diagnosis of  
36 ovarian cancer. Therefore, if use of the 'Simple Rules' halves the intervention rate  
37 from 60% to 30% and assuming a 5% significance level and 90% power, 63 patients  
38 would be required in each group. Allowing for a 10% drop out rate, 140 patients will  
39 be needed. The sample size was calculated by use of Stata 12.1 ® (Stata Corp.,  
40 College Station, TX, USA) as provided by evidence from Machin et al. <sup>7</sup> There was a  
41 3% incidence of ovarian cancer in our pilot study population so we would expect to  
42 find 4 cancer diagnoses in the study population.  
43  
44  
45  
46  
47

### 48 **Discussion**

49 Most asymptomatic adnexal tumours detected on ultrasound scan are benign. In  
50 these women, an operation to remove the cyst is unlikely to be beneficial and may  
51 do harm. By avoiding surgery women are not exposed to surgical and anaesthetic  
52 complications and their care is likely to be more cost-effective. Postmenopausal  
53 women are also more likely to suffer from chronic medical problems such as  
54 diabetes and high blood pressure, which increase operative and anaesthetic risks.  
55 Women with presumed benign cysts will be observed over the following year in 3-4  
56 monthly intervals in order to detect any change in appearance or increase in size,  
57  
58  
59  
60

1  
2  
3 which would be suspicious of malignancy. Any suspicion of malignant change would  
4 trigger a surgical intervention.  
5  
6

7 We will record sensitivities of both protocols for the detection of ovarian cancer.  
8 Although our audit showed that all cases of ovarian malignancies were correctly  
9 classified by both protocols, it is important to confirm this observation in a larger  
10 prospective study. We do expect, however, that the specificity of the 'Simple Rules'  
11 protocol will be higher, which should translate into lower intervention rates.  
12  
13

14 If the study shows that the use of the 'Simple Rules' and conservative management  
15 could substantially reduce intervention rates without increasing the risk of delaying  
16 the diagnosis of ovarian cancer this could have a positive impact on clinical practice,  
17 increase patients' safety and result in significant savings for the health services.  
18  
19  
20

## 21 **Ethics and dissemination**

22  
23

24 Approval for this study was obtained from the North London Research Ethical  
25 Committee 2 (North REC 2), London, UK (10/H0724/48). Written informed consent  
26 is obtained from each patient fulfilling the inclusion criteria before randomisation.  
27 Women who refuse participation are recorded. There is a small risk to patients of a  
28 delayed diagnosis of ovarian cancer and there are also the risks of surgery for those  
29 who are offered surgical intervention.  
30  
31

### 32 **Incident Reporting**

33 Adverse events will be recorded from recruitment to the 1 year scan date for those  
34 who have conservative management or to 3 months post-operatively for those who  
35 have surgery. The chief investigator will be responsible for the reporting of all  
36 serious adverse events (SAE) or suspected unexpected serious adverse reactions  
37 (SUSAR) immediately or as soon as the trial personnel become aware of an event.  
38 The chief investigator will report all fatal or life-threatening events as soon as  
39 possible to the trial coordinating centre (TCC). This will be done not later than seven  
40 days after the chief investigator is first aware of the event. All events which are not  
41 fatal or life-threatening will also reported as soon as possible and not later than 15  
42 days after the chief investigator is first aware of the reaction. The research and  
43 ethics committee (REC) also require a report of all SAEs and SUSARs within 15 days  
44 of the chief investigator being made aware. The principal investigator will also  
45 follow all SAEs and SUSARs through to outcome.  
46  
47  
48  
49

50 The results will be published once the study is complete  
51  
52

### 53 **List of abbreviations**

54 CA125 Cancer antigen 125  
55 RCOG Royal College of Obstetricians and Gynaecologists  
56 RMI Risk of Malignancy Index  
57  
58  
59  
60



## References

1. RCOG **Ovarian cysts in postmenopausal women** Guideline No. 34 October 2003
2. Jacobs I, Oram D, Fairbanks J, Turner J, Frost C, Grudzinskas JG. **A risk of malignancy index incorporating CA125, ultrasound and menopausal status for the accurate preoperative diagnosis of ovarian cancer.** Br J Obstet Gynaecol 1990;97:922-9.
3. Geomini P, Kruitwagen R, Bremer GL, Cnossen J, Mol BW. **The accuracy of risk scores in predicting ovarian malignancy: a systematic review.** Obstet Gynecol. 2009 Feb;113(2 Pt 1):384-94.
4. Timmerman D, Testa AC, Bourne T, Ameye L, Jurkovic D, Van Holsbeke C, Paladini D, Van Calster B, Vergote I, Van Huffel S, Valentin L. **Simple ultrasound-based rules for the diagnosis of ovarian cancer.** Ultrasound Obstet Gynecol. 2008 Jun;31(6):681-90.
5. Timmerman D, Ameye L, Fischerova D, Epstein E, Melis GB, Guerriero S, Van Holsbeke C, Savelli L, Fruscio R, Lissoni AA, Testa AC, Veldman J, Vergote I, Van Huffel S, Bourne T, Valentin L. **Simple ultrasound rules to distinguish between benign and malignant adnexal masses prior to surgery: a prospective validation by the IOTA group.** BMJ. 2010 Dec 14;341:c6839. doi: 10.1136/bmj.c6839.
6. Di Legge A, Testa A, Ameye L, Van Calster B, Lissoni A, Leone F, Savelli L, Franchi D, Czekierdowski A, Trio D, Van Holsbeke C, Ferrazzi E, Scambia G, Timmerman D, Valentin L. **Lesion size affects the diagnostic performance of the International Ovarian Tumor Analysis (IOTA) logistic regression models, the IOTA simple rules and the Risk of Malignancy Index to estimate the risk of malignancy in adnexal masses.** Ultrasound Obstet Gynecol. 2012 May 18. doi: 10.1002/uog.11167. [Epub ahead of print] Accepted article.
7. Machin D, Campbell MJ, Tan SB, Tan SH: **Sample Size Tables for Clinical Studies. Comparing paired groups of binary, ordered categorical and continuous outcomes.** Wiley-Blackwell; Third 2009, 69-83.

## Authors' contributions

NN and DJ were responsible for the development of the study protocol and the application for ethical approval. NN drafted the paper and recruits patients. XF

1  
2  
3 recruits patients. MW provides supervision. DJ provides supervision and has  
4 contributed to the writing of the draft paper.  
5  
6

### 7 **Authors' information**

8 NN and XF are trainees in obstetrics and gynaecology. MW is a Professor of Womens  
9 Cancer at UCL and a consultant gynaecological oncology Consultant at UCLH. DJ is a  
10 gynaecology consultant and ultrasound expert who runs the early pregnancy and  
11 gynaecology clinic.  
12  
13

### 14 **Funding Statement**

15 This research received no specific grant from any funding agency in the public,  
16 commercial or not-for-profit sectors.  
17  
18

### 19 **Competing interests**

20 The authors declare that they have no competing interests  
21  
22

### 23 **Acknowledgements**

24 I would like to acknowledge Mr Paul Bassett as the statistician who did the sample  
25 calculation and generated the randomisation list.  
26  
27

### 28 **Article focus**

- 29 • The primary objective is to assess the differences in surgical intervention  
30 rates between two different protocols for the management of incidentally  
31 detected adnexal tumours in postmenopausal women.
- 32 • Assessment of adnexal tumours using the Risk of Malignancy Index (RMI)  
33 calculation alongside the guidance from the Royal College of Obstetricians  
34 and Gynaecologists (RCOG) as compared with the Simple Rules as designed  
35 by the International Ovarian Tumour Analysis Group (IOTA).  
36  
37

### 38 **Key messages**

- 39 • Most asymptomatic adnexal tumours detected on ultrasound scan are  
40 benign. In these women, an operation to remove the cyst is unlikely to be  
41 beneficial and may do harm.
- 42 • A test, which can better discriminate between benign and malignant  
43 tumours, will afford women without a malignancy to decline surgery.  
44  
45  
46

### 47 **Strengths and limitations of this study**

- 48 • This is the first randomized controlled trial to assess the RMI and the RCOG  
49 protocol against the Simple Rules protocol for the management of  
50 asymptomatic adnexal tumours in postmenopausal women.
- 51 • It is a single centre study, which can affect applicability of the results in other  
52 units.
- 53 • Both assessment and management protocols have high sensitivity rates with  
54 low false negative rates.  
55  
56  
57  
58  
59  
60

1  
2  
3  
4  
5  
6  
7  
8  
9  
10  
11  
12  
13  
14  
15  
16  
17  
18  
19  
20  
21  
22  
23  
24  
25  
26  
27  
28  
29  
30  
31  
32  
33  
34  
35  
36  
37  
38  
39  
40  
41  
42  
43  
44  
45  
46  
47  
48  
49  
50  
51  
52  
53  
54  
55  
56  
57  
58  
59  
60

For peer review only

1  
2  
3  
4  
5  
6  
7  
8  
9  
10  
11  
12  
13  
14  
15  
16  
17  
18  
19  
20  
21  
22  
23  
24  
25  
26  
27  
28  
29  
30  
31  
32  
33  
34  
35  
36  
37  
38  
39  
40  
41  
42  
43  
44  
45  
46  
47  
48  
49  
50  
51  
52  
53  
54  
55  
56  
57  
58  
59  
60

## Flowchart

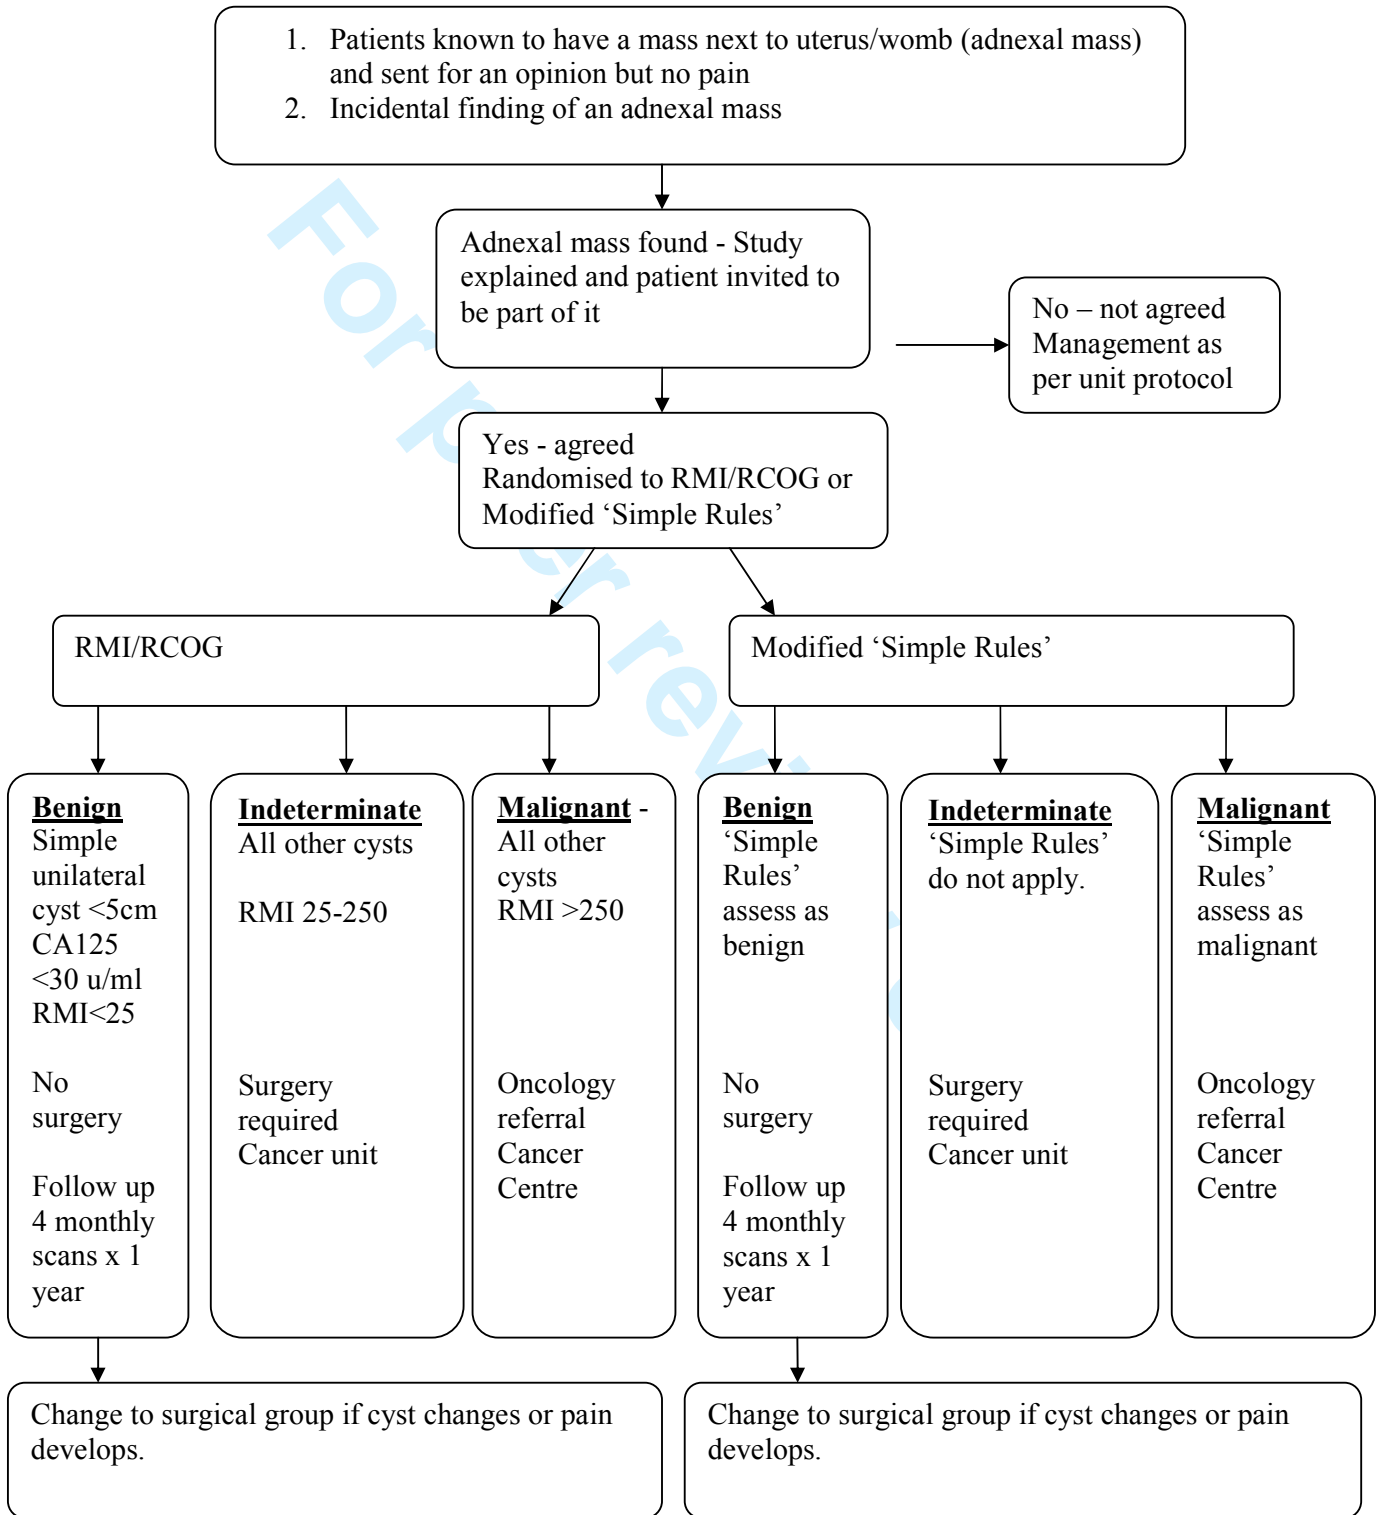

**Research Checklist**  
**SPIRIT Checklist**

| Checklist item                                               | Completed | Page Number       |
|--------------------------------------------------------------|-----------|-------------------|
| Administrative information                                   | √         | 4                 |
| Introduction                                                 | √         | 3-4               |
| Methods: Participants, interventions, outcomes               | √         | 5-6               |
| Methods: Assignment of interventions (for controlled trials) | √         | 5                 |
| Methods: Data collection, management, analysis               | √         | 6                 |
| Methods: Monitoring                                          | √         | 6-7               |
| Ethics and dissemination                                     | √         | 7                 |
| Appendices                                                   | √         | Supplemental file |



**A randomised controlled trial comparing surgical intervention rates between two protocols for the management of asymptomatic adnexal tumours in postmenopausal women: A study protocol**

|                                 |                                                                                                                                                                                                                                                                                                |
|---------------------------------|------------------------------------------------------------------------------------------------------------------------------------------------------------------------------------------------------------------------------------------------------------------------------------------------|
| Journal:                        | <i>BMJ Open</i>                                                                                                                                                                                                                                                                                |
| Manuscript ID:                  | bmjopen-2012-002248                                                                                                                                                                                                                                                                            |
| Article Type:                   | Protocol                                                                                                                                                                                                                                                                                       |
| Date Submitted by the Author:   | 22-Oct-2012                                                                                                                                                                                                                                                                                    |
| Complete List of Authors:       | Nunes, Natalie; University College Hospital, Gynaecology<br>Foo, Xulin; University College Hospital, Gynaecology Diagnostic & Treatment Unit<br>Widschwendter, Martin; University College Hospital, 2Department of Women's Cancer<br>Jurkovic, Davor; University College Hospital, Gynaecology |
| <b>Primary Subject Heading</b>: | Obstetrics and gynaecology                                                                                                                                                                                                                                                                     |
| Secondary Subject Heading:      | Radiology and imaging                                                                                                                                                                                                                                                                          |
| Keywords:                       | Cancer, GYNAECOLOGY, Imaging, Gynaecological oncology < ONCOLOGY, Surgical pathology < PATHOLOGY, Ultrasound < RADIOLOGY & IMAGING                                                                                                                                                             |
|                                 |                                                                                                                                                                                                                                                                                                |

SCHOLARONE™  
Manuscripts

Short Title: RCT of two management protocols for asymptomatic adnexal tumours  
**A randomised controlled trial comparing surgical intervention rates between two protocols for the management of asymptomatic adnexal tumours in postmenopausal women: A study protocol**

**Natalie Nunes<sup>1</sup>, Xulin Foo<sup>1</sup>, Martin Widschwendter<sup>2</sup>, Davor Jurkovic<sup>1\*</sup>**

<sup>1</sup>Gynaecological Diagnostic Outpatient Treatment Unit, University College Hospital, London, United Kingdom

<sup>2</sup>Department of Women's Cancer, University College London, Elizabeth Garrett Anderson, Institute for Women's Health, London, United Kingdom

**\*Correspondence: [davor.jurkovic@nhs.net](mailto:davor.jurkovic@nhs.net)**

**Department of Obstetrics and Gynaecology, University College Hospital, 235 Euston Road, London, NW1 2BU, UK**

## **Abstract**

### **Introduction:**

Detection of asymptomatic adnexal tumours in postmenopausal women has increased due to wider use of diagnostic ultrasound and imaging quality improvements. Reliable methods to differentiate between benign and malignant tumours are required to avoid delays in treating ovarian cancer and to prevent unnecessary interventions for benign lesions. In the UK the Royal College of Obstetricians and Gynaecologists (RCOG) has issued guidance for the management of adnexal cysts in postmenopausal women, which is considered standard in routine clinical practice. The protocol utilises the Risk of Malignancy Index (RMI) to assess the risk of adnexal lesion being malignant. This protocol has a relatively high intervention rate in order to avoid a delay in a cancer diagnosis. The Simple Rules Protocol designed by International Ovarian Tumour Analysis Group (IOTA) reports a low false positive rate in the diagnosis of ovarian cancer without a loss of sensitivity and therefore has the potential to reduce unnecessary interventions in asymptomatic postmenopausal women with benign cysts.

### **Methods and analysis:**

140 postmenopausal women aged 40-80, with incidentally detected adnexal tumours on ultrasound scan will be recruited to this study. They will be randomly allocated, to be assessed and managed according to either of the two protocols under investigation. In both arms of the study the tumours will be classified into three groups: high, intermediate or low risk of malignancy. Women with high risk of malignancy will be referred for management in a tertiary cancer centre, women with low risk tumours will be managed expectantly, whilst those with intermediate risk findings have surgery in their local hospital units. Analysis will be on an intention to treat basis.

### **Ethics and dissemination:**

1  
2  
3 Research ethical approval was granted by the North London Research Ethical  
4 Committee 2 (10/H0724/48). Trial results will be published according to the  
5 CONSORT statement.  
6  
7

8 **Trial registration number:**

9 Registration at <http://www.controlled-trials.com/ISRCTN89034131/>.

10 **ISRCTN89034131**  
11  
12

13  
14 **Keywords**

15  
16 Adnexal tumours, Ovarian cysts, Postmenopausal, RMI, RCOG, IOTA Simple Rules,  
17 Management protocols  
18  
19  
20  
21  
22  
23  
24  
25  
26  
27  
28  
29  
30  
31  
32  
33  
34  
35  
36  
37  
38  
39  
40  
41  
42  
43  
44  
45  
46  
47  
48  
49  
50  
51  
52  
53  
54  
55  
56  
57  
58  
59  
60



## Introduction

Wider and more liberal use of diagnostic ultrasound in gynaecological clinics has resulted in the detection of adnexal tumours in a large number of asymptomatic postmenopausal women. There has also been an increase in the use of other imaging modalities such as CT and MRI to assess a variety of medical complaints resulting in incidental detection of adnexal tumours. Any adnexal cyst detected in menopause has a potential of being malignant.

In the United Kingdom the Royal College of Obstetricians and Gynaecologists (RCOG) has issued a guideline for the management of cysts in postmenopausal women, which is widely used in the routine clinical practice.<sup>1</sup> According to this protocol all adnexal cysts/tumours are categorised as high, intermediate and low risk of being malignant. This categorisation is based on the Risk of Malignancy Index (RMI) calculation.<sup>2</sup> This model calculates a score which is the product of the value of the CA 125 (U/ml), a score for menopausal status (1 if pre-menopausal and 3 if postmenopausal) and a greyscale ultrasound score of 0, 1 or 3 where 1 score is given each for bilaterality, ascites, multilocular, solid areas and intra-abdominal metastases. In the original study by Jacobs, a score of >200 gave a sensitivity of 85% and a specificity of 97% for the diagnosis of ovarian cancer. A recent systematic review of 16 studies assessing the diagnostic performance of RMI showed that the test had an overall sensitivity of 78% (95% CI 71–85%) and a specificity of 87% (95% CI 83–91%).<sup>3</sup>

The RMI has the advantage of being simple and widely used. Its disadvantage though is that it includes a blood test for CA125, which adds to the cost. In addition the diagnosis is delayed until the result of blood test is available. The absolute value of the RMI and the level of CA125 in serum are used to determine the management plan. Simple unilateral adnexal cysts of <5cm with an RMI of <25 and where the CA 125 is <30u/ml are considered low risk. For cysts with an RMI<25 but where the CA 125 ≥30u/ml, the cyst is ≥5cm or the cyst has septations or solid areas then these are considered of intermediate risk. Those with a RMI of 25–250 are also considered to be of indeterminate risk. Adnexal tumours with a RMI >250 are classified as high risk.<sup>1</sup> (Flowchart) As the main aim of this protocol is to minimise the risk of delaying interventions in women with ovarian cancer, the overall intervention rates are relatively high and many women with benign lesions are treated by surgery.

In recent years the International Ovarian Tumour Analysis (IOTA) collaboration has developed several novel diagnostic models with the aim of improving non-invasive diagnosis of ovarian cancer. In 2008 the collaboration proposed use of 'Simple Rules' to assess tumours.<sup>4</sup> The 'Simple Rules' are based on a structured approach to morphological analysis of ovarian tumours on ultrasound scan. It enables discrimination between benign and malignant lesions without the need to measure tumour markers.

1  
2  
3  
4  
5  
6  
7  
8  
9  
10  
11  
12  
13  
14  
15  
16  
17  
18  
19  
20  
21  
22  
23  
24  
25  
26  
27  
28  
29  
30  
31  
32  
33  
34  
35  
36  
37  
38  
39  
40  
41  
42  
43  
44  
45  
46  
47  
48  
49  
50  
51  
52  
53  
54  
55  
56  
57  
58  
59  
60

Ultrasound scan ‘Simple Rules’ use 10 rules to assess adnexal tumours. There are five rules to predict malignancy (M-rules): (1) irregular solid tumour; (2) presence of ascites; (3) at least four papillary structures; (4) irregular multilocular–solid tumour with a largest diameter of at least 100 mm; and (5) very high colour content on colour Doppler examination (colour score 4). There are five rules to suggest a benign tumour (B-rules): (1) unilocular cyst; (2) presence of solid components where the largest solid component is <7 mm in largest diameter; (3) acoustic shadows; (4) smooth multilocular tumour less than 100 mm in largest diameter; and (5) no detectable blood flow on Doppler examination (colour score 1).

If one or more M-rules apply in the absence of a B-rule, the mass is classified as malignant. If one or more B-rules apply in the absence of an M-rule, the mass is classified as benign. If no rule applies or both M and B rules apply, the mass cannot be classified and defined as indeterminate.

These ten rules were applicable to 76% (937/1233) of all tumours in the study, where they resulted in a sensitivity of 93%, specificity of 90%, positive likelihood ratio (LR+) of 9.45 and negative likelihood ratio (LR-) of 0.08.<sup>4</sup> When prospectively tested the rules were applicable in 76% (386/507) of the tumours, where they had a sensitivity of 95% (106/112), a specificity of 91% (249/274), LR+ of 10.37, and LR- of 0.06. The ‘Simple Rules’ were subsequently tested prospectively.<sup>5</sup> The rules were applicable in 77% of the 1938 women with a sensitivity of 92% (95% confidence interval 89% to 94%) and specificity of 96% (94% to 97%).

The Simple Rules Model is particularly suitable for the use in standard clinical practice and, similar to the RMI, can be modified to divide the cysts into high, intermediate and low risk categories. There is some evidence, albeit limited, that the Simple Rules model may be superior to the RMI in terms of sensitivity and specificity.<sup>2,5,6</sup> Successful use of Simple Rules require more skilled ultrasound operators, but there is no need for additional blood tests and the results are available instantly.

## Methods and analysis

The aim of this study is to assess the difference in the intervention rates between two different protocols for the management of incidentally detected adnexal tumours in postmenopausal women.

This is a prospective randomised controlled trial that will take place at the University College London Hospital gynaecology clinic. Women will be randomised into two groups. The first group will be assessed and managed in accordance with the current Royal College of Obstetricians and Gynaecologists protocol for the management of cysts in postmenopausal women.<sup>1</sup> The second group of women will be assessed and managed using the “Simple Rules” protocol.<sup>4</sup>

### Inclusion criteria

All postmenopausal women aged 40-80 who are referred for an asymptomatic adnexal tumour or those found to have one at the time of their visit to the Gynaecology unit will be invited to take a part of the study. Postmenopausal women are defined as those who have had one year of spontaneous amenorrhoea above the age of 40 where no illness or medication may have caused the amenorrhoea or those at or above the age of 50 who have had a hysterectomy. Women will be judged to be asymptomatic if they did not present with pain localised to the area of the tumour or the lower pelvis.

Women who present with pelvic pain that could be attributed to the tumour and those who are younger than 40 or older than 80 years of age will be excluded. Women who are unable to consent and those with simple unilateral unilocular cysts <2cm in size will also be excluded as the RCOG guideline stipulates these women do not require follow up.

### Interventions

All women will have an initial ultrasound scan. All examinations will be performed by level II ultrasound operators, who have been fully trained in the assessment of adnexal tumours using both the RMI and "Simple Rules" approach. Those randomised to the RCOG/RMI group will also have a blood test taken for the measurement of serum CA125. The tumours will be classified as low, intermediate and high risk as previously described (flowchart) In the Simple Rules group, adnexal tumours will be classified as low risk if one or more B-rules apply in the absence of an M-rule. If one or more M-rules apply in the absence of a B-rule, the mass will be classified as high risk. If no rules apply or if both M and B rules apply, the tumour will be classified as intermediate risk.

Women with tumours classified as high risk of malignancy by either protocol, will be referred to the Gynaecological Oncology team. Tumours found to be of intermediate risk will be offered surgery by the general gynaecology team. All asymptomatic women diagnosed with low risk tumours will be managed conservatively and have 4 monthly scans for 1 year observing for any changes in the tumour size or morphology. Should the characteristics of the tumour change prompting its reclassification into intermediate or high risk category the management plan will be modified accordingly. Following conclusion of the study all women who did not require an intervention will be offered yearly follow up ultrasound scans for a further four years.

### Randomisation

A statistician using a Stata 12.1 ® (Stata Corp., College Station, TX, USA) will generate the blocked randomisation list with varying block sizes. The randomisation numbers will be placed in sealed, opaque, numbered envelopes and kept in a box locked in a filing cabinet. This randomisation ensures allocation

1  
2  
3 concealment. When a patient consents, a clinic nurse who is not part of the research  
4 team will access the next envelope and give it to the recruiting doctor.  
5  
6  
7

### 8 **Outcome measures**

9 The primary outcome is the rate of surgical intervention. Secondary outcomes  
10 include the number of delayed diagnoses of ovarian cancer, number of staging  
11 surgical procedures and number of surgical complications.  
12  
13

### 14 **Data Collection and Statistical analysis**

15 The data is collected on a pre-designed proforma, which is then filed. This is  
16 transferred to a Microsoft Excel database in preparation for analysis. A Chi-square  
17 test or Fisher's exact test will be used will be used to assess significant differences in  
18 the intervention rates between the two management protocols.  
19

20 Analysis will be on an intention to treat basis of all patients who fit the inclusion  
21 criteria. The researchers will do the analysis with the statistician at the midpoint  
22 and at the end.  
23  
24  
25

### 26 **Pilot Study and Sample Size**

27 A preliminary prospective audit of 67 patients was done. These patients were aged  
28 47 to 90 years. Using RMI/RCOG group protocol 41/67 [61.2% (95% CI 48.5 to  
29 72.9)] were classified as requiring a surgical intervention compared to 5/67 [7.5%  
30 (95%CI;2.5 to 16.6)] when the 'Simple Rules' protocol was used. The women with  
31 the final diagnosis of ovarian cancer were classified as high (n=1) or intermediate  
32 (n=1) risk by both protocols and they both had surgery performed by the  
33 gynaecological oncology team. We will assume that some patients offered  
34 conservative management will choose to still have surgery and that some patients  
35 who are offered surgery will choose not have an operation.  
36  
37  
38

39 A significant improvement of surgical rates is considered to be a 50% reduction  
40 without a significant difference in the number of women with a delayed diagnosis of  
41 ovarian cancer. Therefore, if use of the 'Simple Rules' halves the intervention rate  
42 from 60% to 30% and assuming a 5% significance level and 90% power, 63 patients  
43 would be required in each group. Allowing for a 10% drop out rate, 140 patients will  
44 be needed. The sample size was calculated by use of Stata 12.1 ® (Stata Corp.,  
45 College Station, TX, USA) as provided by evidence from Machin et al. <sup>7</sup> There was a  
46 3% incidence of ovarian cancer in our pilot study population so we would expect to  
47 find 4 cancer diagnoses in the study population.  
48  
49  
50  
51

### 52 **Discussion**

53 Most asymptomatic adnexal tumours detected on ultrasound scan are benign. In  
54 these women, an operation to remove the cyst is unlikely to be beneficial and may  
55 do harm.  
56  
57  
58  
59  
60

1  
2  
3 By avoiding surgery women are not exposed to surgical and anaesthetic  
4 complications and their care is likely to be more cost-effective. Recent trials have  
5 shown that unnecessary interventions in women with benign adnexal lesions lead to  
6 significant morbidity and mortality, which offsets the potential benefits of screening  
7 for ovarian cancers.<sup>8</sup> Postmenopausal women are also more likely to suffer from  
8 chronic medical problems such as diabetes and high blood pressure, which increase  
9 operative and anaesthetic risks. Women with presumed benign cysts will be  
10 observed over the following year in 3-4 monthly intervals in order to detect any  
11 change in appearance or increase in size, which would be suspicious of malignancy.  
12 Any suspicion of malignant change would trigger a surgical intervention.  
13  
14  
15

16  
17 We will record sensitivities of both protocols for the detection of ovarian cancer.  
18 Although our audit showed that all cases of ovarian malignancies were correctly  
19 classified by both protocols, it is important to confirm this observation in a larger  
20 prospective study. We do expect, however, that the specificity of the 'Simple Rules'  
21 protocol will be higher, which should translate into lower intervention rates.  
22  
23

24 If the study shows that the use of the 'Simple Rules' and conservative management  
25 could substantially reduce intervention rates without increasing the risk of delaying  
26 the diagnosis of ovarian cancer this could have a positive impact on clinical practice,  
27 increase patients' safety and result in significant savings for the health services.  
28  
29

### 30 31 **Ethics and dissemination**

32  
33 Approval for this study was obtained from the North London Research Ethical  
34 Committee 2 (North REC 2), London, UK (10/H0724/48). Written informed consent  
35 is obtained from each patient fulfilling the inclusion criteria before randomisation.  
36 Women who refuse participation are recorded. There is a small risk to patients of a  
37 delayed diagnosis of ovarian cancer and there are also the risks of surgery for those  
38 who are offered surgical intervention.  
39  
40  
41

### 42 **Incident Reporting**

43 Adverse events will be recorded from recruitment to the 1 year scan date for those  
44 who have conservative management or to 3 months post-operatively for those who  
45 have surgery. The chief investigator will be responsible for the reporting of all  
46 serious adverse events (SAE) or suspected unexpected serious adverse reactions  
47 (SUSAR) immediately or as soon as the trial personnel become aware of an event.  
48 The chief investigator will report all fatal or life-threatening events as soon as  
49 possible to the trial coordinating centre (TCC). This will be done not later than seven  
50 days after the chief investigator is first aware of the event. All events which are not  
51 fatal or life-threatening will also reported as soon as possible and not later than 15  
52 days after the chief investigator is first aware of the reaction. The research and  
53 ethics committee (REC) also require a report of all SAEs and SUSARs within 15 days  
54  
55  
56  
57  
58  
59  
60

of the chief investigator being made aware. The principal investigator will also follow all SAEs and SUSARs through to outcome.

The results will be published once the study is complete

### List of abbreviations

|       |                                                   |
|-------|---------------------------------------------------|
| CA125 | Cancer antigen 125                                |
| RCOG  | Royal College of Obstetricians and Gynaecologists |
| RMI   | Risk of Malignancy Index                          |

### References

1. RCOG Ovarian cysts in postmenopausal women Guideline No. 34 October 2003
2. Jacobs I, Oram D, Fairbanks J, et al. A risk of malignancy index incorporating CA125, ultrasound and menopausal status for the accurate preoperative diagnosis of ovarian cancer. *Br J Obstet Gynaecol* 1990;97:922-9.
3. Geomini P, Kruitwagen R, Bremer GL, et al. The accuracy of risk scores in predicting ovarian malignancy: a systematic review. *Obstet Gynecol*. 2009 Feb;113(2 Pt 1):384-94.
4. Timmerman D, Testa AC, Bourne T, et al. Simple ultrasound-based rules for the diagnosis of ovarian cancer. *Ultrasound Obstet Gynecol*. 2008 Jun;31(6):681-90.
5. Timmerman D, Ameye L, Fischerova D, et al. Simple ultrasound rules to distinguish between benign and malignant adnexal masses prior to surgery: a prospective validation by the IOTA group. *BMJ*. 2010 Dec 14;341:c6839. doi: 10.1136/bmj.c6839.
6. Di Legge A, Testa A, Ameye L, et al. Lesion size affects the diagnostic performance of the International Ovarian Tumor Analysis (IOTA) logistic regression models, the IOTA simple rules and the Risk of Malignancy Index to estimate the risk of malignancy in adnexal masses. *Ultrasound Obstet Gynecol*. 2012 May 18. doi: 10.1002/uog.11167. [Epub ahead of print] Accepted article.
7. Machin D, Campbell MJ, Tan SB, et al: *Sample Size Tables for Clinical Studies. Comparing paired groups of binary, ordered categorical and continuous outcomes.* Wiley-Blackwell; Third 2009, 69-83

- 1  
2  
3  
4  
5  
6  
7  
8  
9
8. Buys SS, Partridge E, Black A, et al. Effect of screening on ovarian cancer mortality: the Prostate, Lung, Colorectal and Ovarian (PLCO) Cancer Screening Randomized Controlled Trial. JAMA. 2011 Jun 8;305(22):2295-303.

10  
11

### **Authors' contributions**

12 NN and DJ conceived the idea and contributed to the design along with MW. XF  
13 contributed to design and NN with XF are responsible for data acquisition. NN and DJ  
14 prepared the initial article draft and circulated it to the other authors XF and MW until all  
15 authors approved the final article for submission.  
16

17  
18

### **Authors' information**

19 NN and XF are trainees in obstetrics and gynaecology. MW is a Professor of Womens  
20 Cancer at UCL and a consultant gynaecological oncology Consultant at UCLH. DJ is a  
21 gynaecology consultant and ultrasound expert who runs the early pregnancy and  
22 gynaecology clinic.  
23  
24

25

### **Funding Statement**

26 This research received no specific grant from any funding agency in the public,  
27 commercial or not-for-profit sectors.  
28

29  
30

### **Competing interests**

31 The authors declare that they have no competing interests  
32

33  
34

### **Acknowledgements**

35 I would like to acknowledge Mr Paul Bassett as the statistician who did the sample  
36 calculation and generated the randomisation list.  
37

38  
39

### **Article focus**

- 40  
41  
42  
43  
44  
45  
46  
47  
48
- The primary objective is to assess the differences in surgical intervention rates between two different protocols for the management of incidentally detected adnexal tumours in postmenopausal women.
  - Assessment of adnexal tumours using the Risk of Malignancy Index (RMI) calculation alongside the guidance from the Royal College of Obstetricians and Gynaecologists (RCOG) as compared with the Simple Rules as designed by the International Ovarian Tumour Analysis Group (IOTA).

49  
50

### **Key messages**

- 51  
52  
53  
54  
55  
56  
57  
58  
59  
60
- Most asymptomatic adnexal tumours detected on ultrasound scan are benign. In these women, an operation to remove the cyst is unlikely to be beneficial and may do harm.
  - A test, which can better discriminate between benign and malignant tumours will afford women without a malignancy to decline surgery.

**Strengths and limitations of this study**

- This is the first randomized controlled trial to assess the RMI and the RCOG protocol against the Simple Rules protocol for the management of asymptomatic adnexal tumours in postmenopausal women.
- It is a single centre study, which can affect applicability of the results in other units.
- Both assessment and management protocols have high sensitivity rates with low false negative rates.

For peer review only



## Flowchart

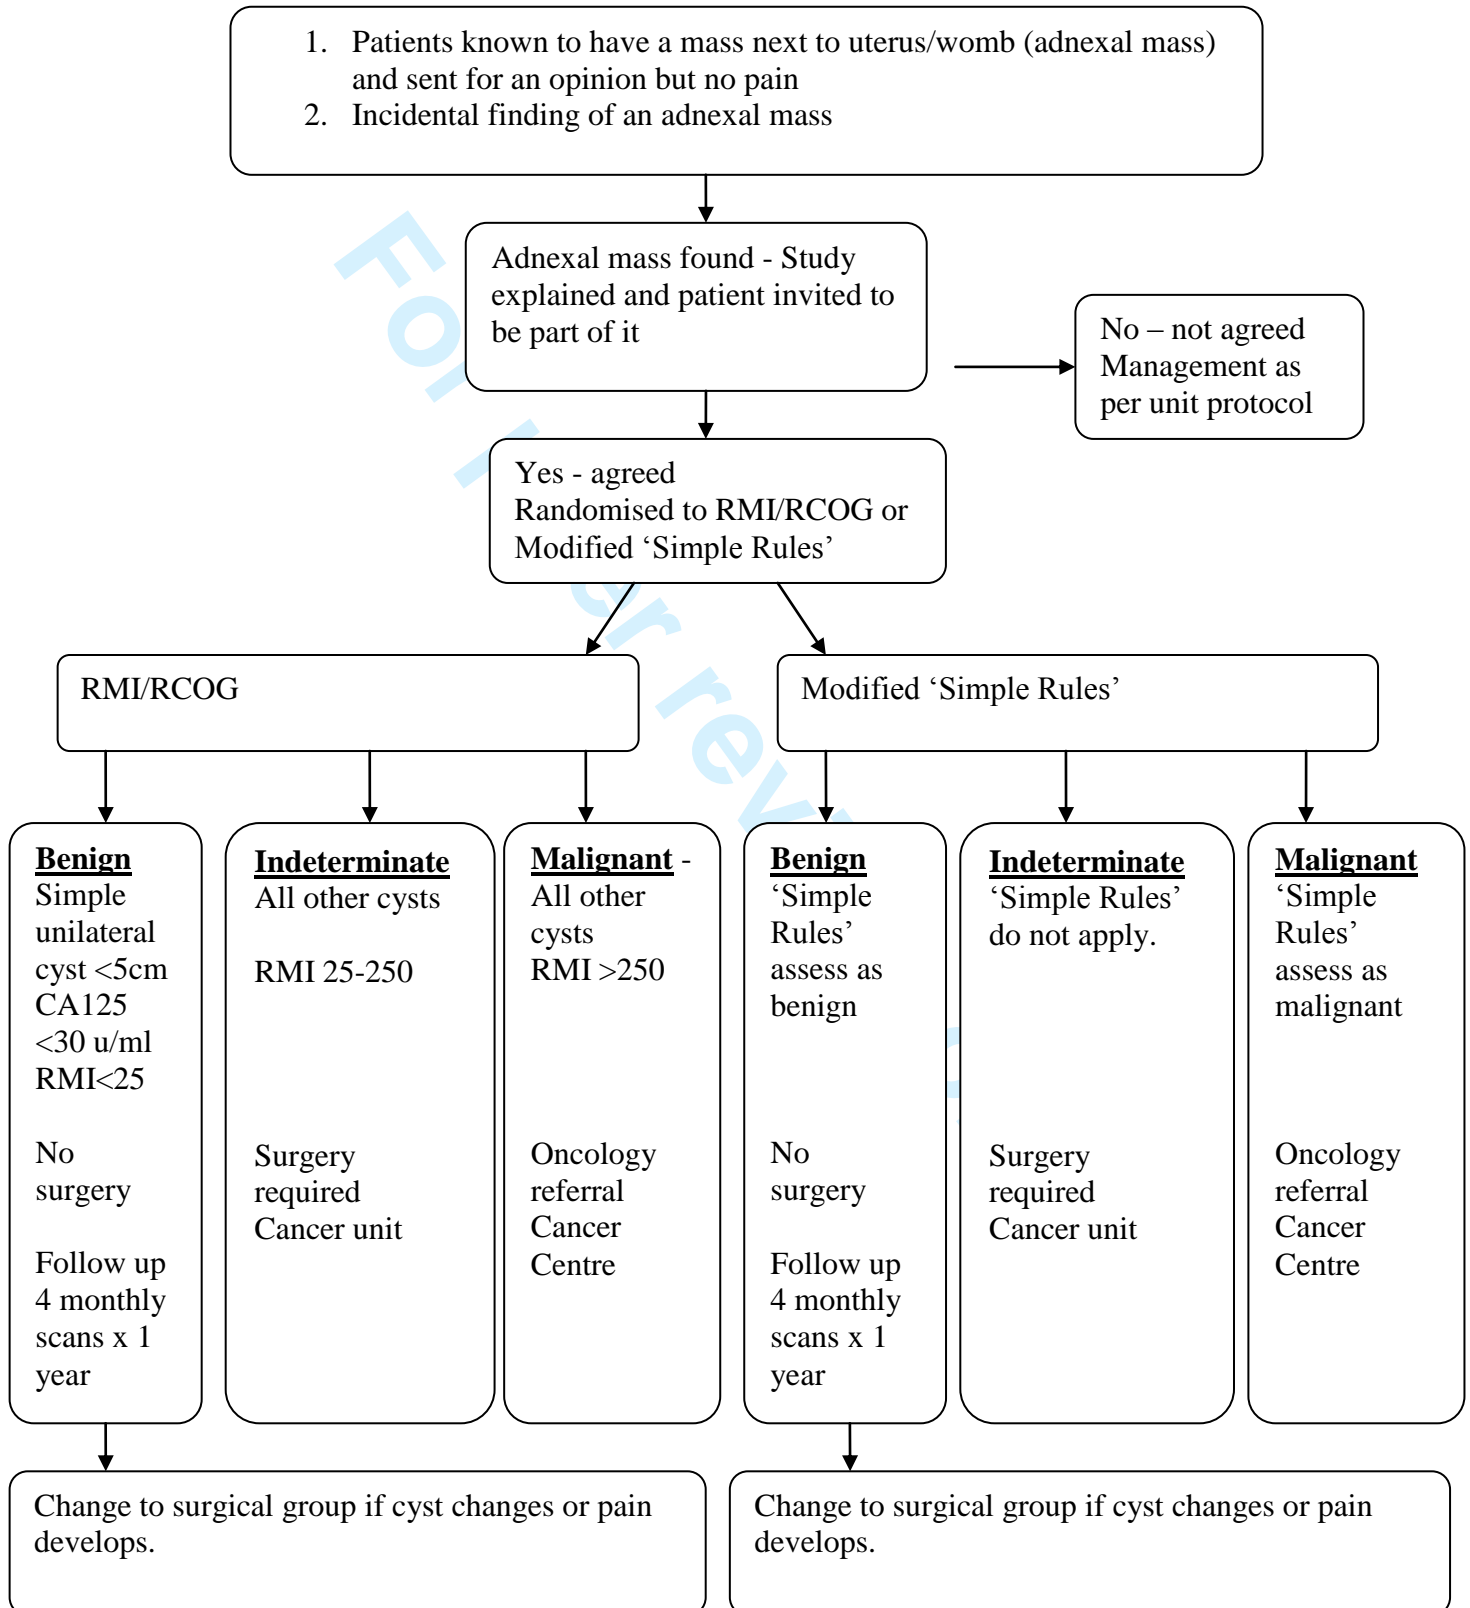

Supplement: bmjopen-2012-002248.draft_revisions.pdf [file bmjopen-2012-002248.draft_revisions.pdf]
